# Supplementary material
Source: PubMed Central journal article supplement (PMC5125018)
Supplement: NIHMS828510-supplement-supplemental_Figure_1.pdf [file NIHMS828510-supplement-supplemental_Figure_1.pdf]

## Supplemental Material

### Supplemental Figure 1.

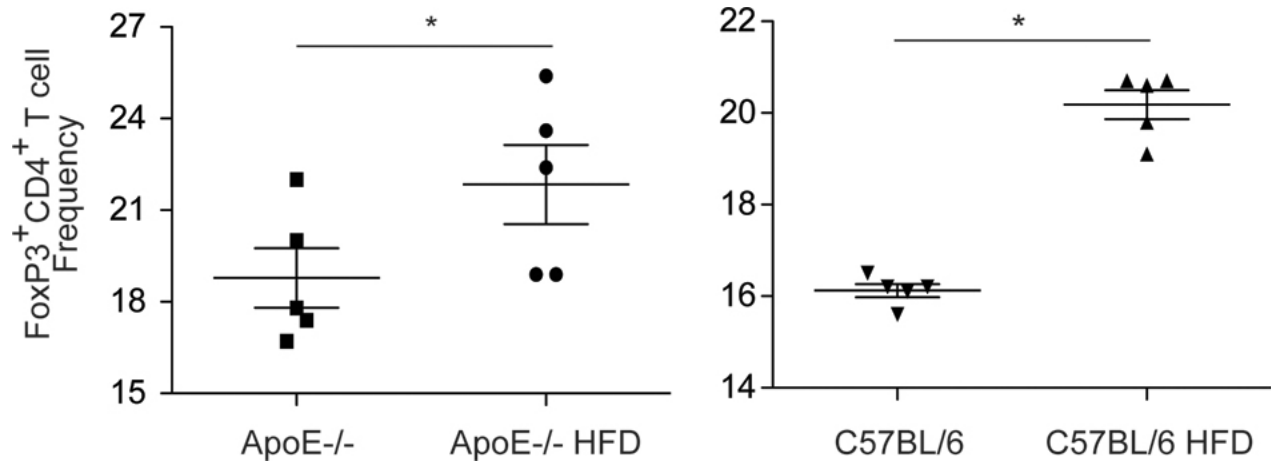

Frequency of FoxP3<sup>+</sup>CD4<sup>+</sup> cells in the spleen of ApoE<sup>-/-</sup> mice fed high fat diet (HFD) for 4 weeks, and age matched controls fed normal chow (NC), or in C57BL/6 mice fed high fat diet for ten weeks, and age matched C57BL/6 mice fed normal chow. Asterisk indicates P<0.05.
